# Supplementary material
Source: publisher figshare collection journal article supplement (https://acs.figshare.com/ndownloader/files/4253176)
Supplement: Supplementary file 1 [file 4253176]

**Controlled dopant distribution and higher doping efficiencies by surface-functionalized atomic layer deposition**

Angel Yanguas-Gil, Kyle E. Peterson, and Jeffrey W. Elam.

**Mass spectrometry (MS) measurements**

MS data was taken using a Stanford Research Systems SRS-300 RGA placed downstream of the reactor (Ref. 12). Mass fragments  $m/z=31$  and  $32$ , attributed to  $\text{CH}_2\text{OH}^+$  and its corresponding isotopic shift, were followed as a function of time. Figure S1 shows data taken during multiple  $\text{EtOH}/\text{H}_2\text{O}$  and  $\text{EtOH}/\text{D}_2\text{O}$  exposures in an  $\text{Al}_2\text{O}_3$ -coated reactor at  $200^\circ\text{C}$  using 1 Torr of ultrahigh purity  $\text{N}_2$  as a carrier gas. Upon dosing with  $\text{H}_2\text{O}$ , an increase of  $m/z=31$  was observed. When  $\text{D}_2\text{O}$  was substituted as the co-reactant, a significant increase in  $m/z=32$  was observed during the  $\text{D}_2\text{O}$  pulse. These observations are consistent with the displacement of functional groups (either ethoxides or acetates) by  $\text{H}_2\text{O}$  to produce  $\text{CH}_2\text{OH}^+$  fragments, and by  $\text{D}_2\text{O}$  to produce  $\text{CH}_2\text{OD}^+$  fragments.

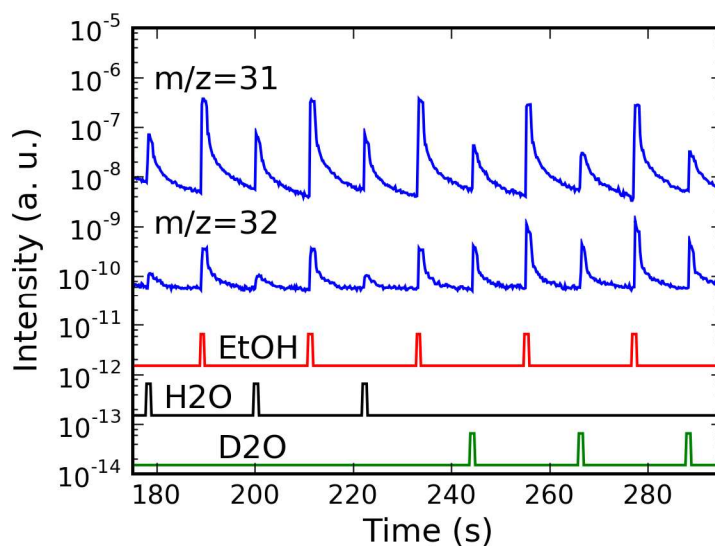

**Figure S1: Time dependence of the intensities of  $m/z=31$  and  $32$  during the sequential dosing of  $\text{EtOH}/\text{H}_2\text{O}$  and  $\text{EtOH}/\text{D}_2\text{O}$  on an  $\text{Al}_2\text{O}_3$  surface as measured by MS.**

### Thickness uniformity measurements

A series of Si(100) substrates were evenly spaced in the axial direction of flow along the ~40 cm deposition zone of the ALD reactor. The substrates were coated using 200 cycles of surface functionalized ALD with the sequence iPrOH/TMA/H<sub>2</sub>O at 200 °C. The coating thicknesses for these samples were measured by spectroscopic ellipsometry (SE) and are shown in Fig. S2. The coating thicknesses were highly uniform along the reactor (+/- 0.5%) with an average value of 125 Å.

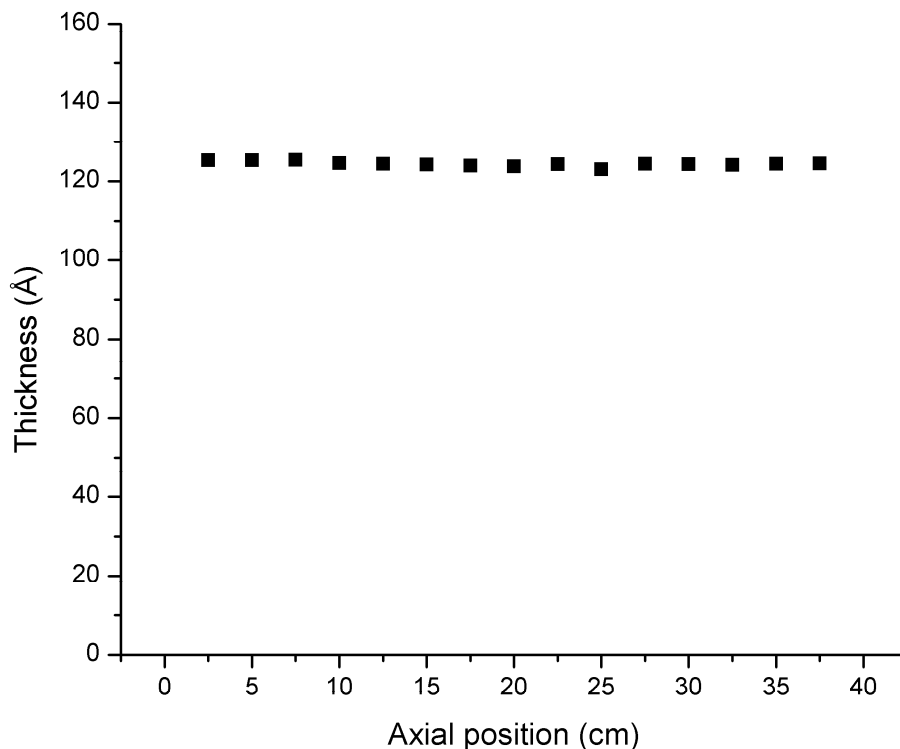

**Figure S2: Thickness of Al<sub>2</sub>O<sub>3</sub> films prepared by surface functionalized ALD on Si(100) versus position along axial direction of flow in the ALD reactor as determined by SE.**

### Quartz crystal microbalance (QCM) measurements

QCM measurements during repeated EtOH/H<sub>2</sub>O exposures on an ALD Al<sub>2</sub>O<sub>3</sub> surface show that the mass gain during the first EtOH exposure was higher than in subsequent exposures (Fig. S3). This difference is consistent with the adsorption of some EtOH on bridging O or OH sites without releasing H<sub>2</sub>O. During the subsequent EtOH exposures, EtOH reacts only with OH sites releasing H<sub>2</sub>O so that the net mass change is smaller.

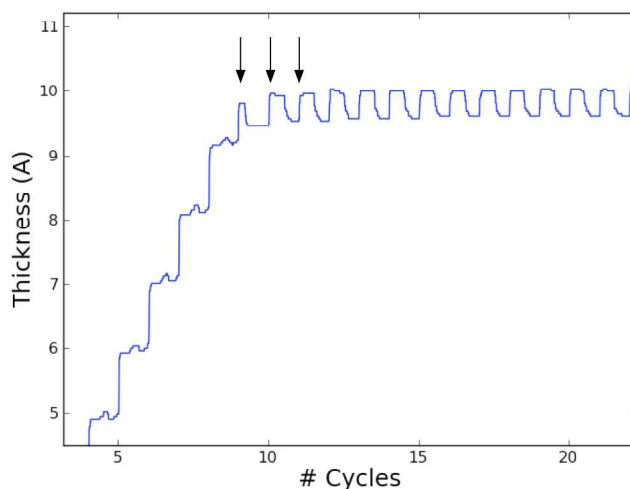

**Figure S3: Mass gain during repeated EtOH/H<sub>2</sub>O exposures on an Al<sub>2</sub>O<sub>3</sub> surface as measured by QCM. EtOH exposures are indicated by arrows in the figure.**

#### **Elemental analysis of ALD Al<sub>2</sub>O<sub>3</sub> and ZnO films**

X-ray photoelectron spectroscopy (XPS) depth-profiling measurements of the C, O, Al, and Si concentrations were performed on Al<sub>2</sub>O<sub>3</sub> films deposited on Si(100) substrates prepared both using conventional ALD and surface functionalized ALD using EtOH. Figure S4 shows that the C signals are below the XPS detection limit of ~0.2 at% for both samples demonstrating that surface functionalization does not introduce C impurities into the Al<sub>2</sub>O<sub>3</sub>. Similar XPS measurements performed for the C, O, Zn, and Si concentrations on ALD ZnO films prepared with and without EtOH surface functionalization. These measurements showed no C impurities in the ZnO films. These results demonstrate that the functionalization species deposited by EtOH are completely removed by the H<sub>2</sub>O coreactant.

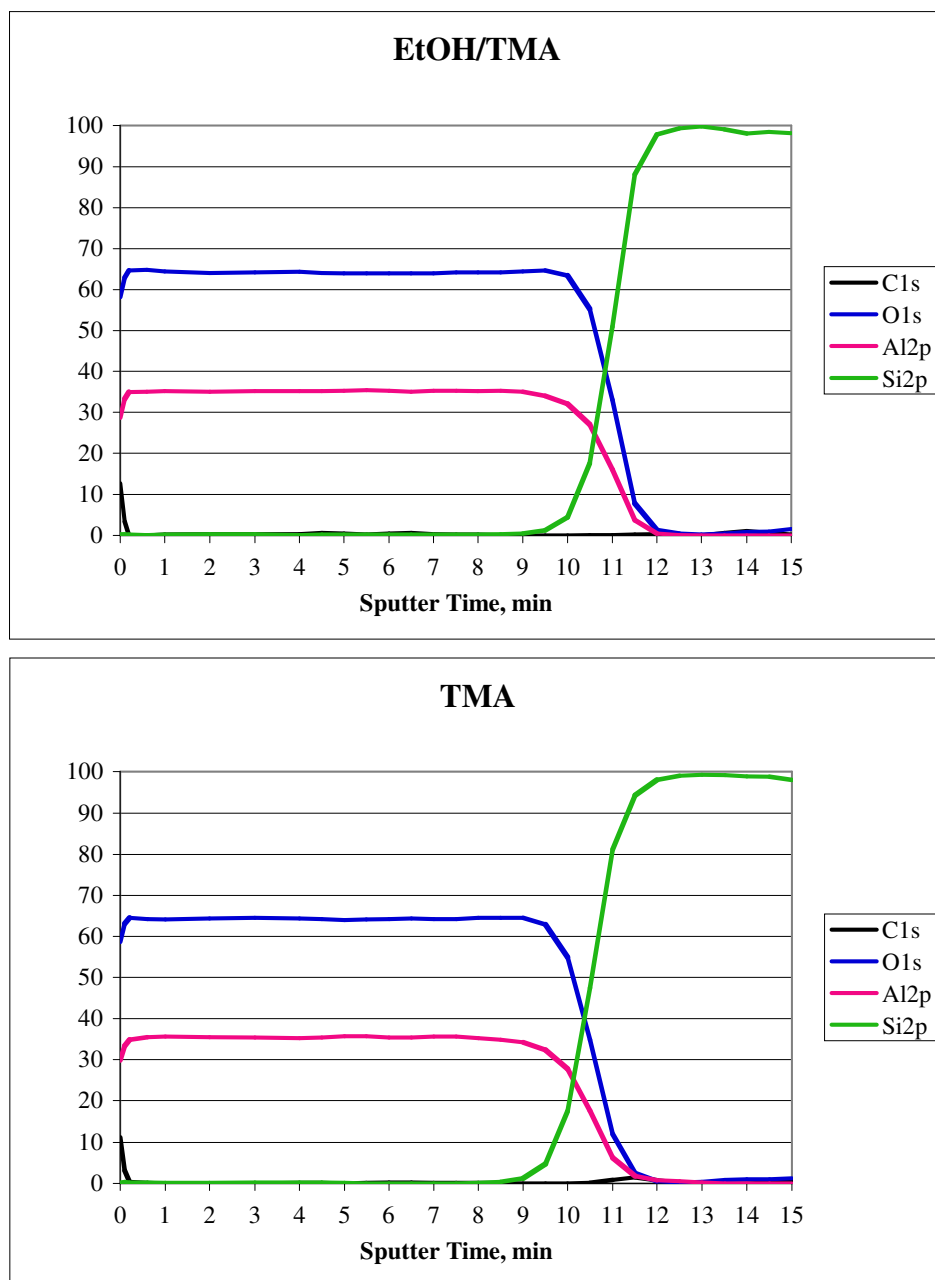

**Figure S4: XPS depth profile measurements for the C, O, Al, and Si concentrations in  $\text{Al}_2\text{O}_3$  prepared using surface-functionalized ALD with EtOH (top) and conventional ALD (bottom)**

### Spectroscopic ellipsometry of ALD $\text{Al}_2\text{O}_3$ films

We carried out ex-situ spectroscopic ellipsometry (SE) measurements of  $\text{Al}_2\text{O}_3$  films prepared using both conventional and by surface functionalized ALD with EtOH using a J. A. Woollam Co. Alpha-SE ellipsometer over the wavelength range 375-900 nm.

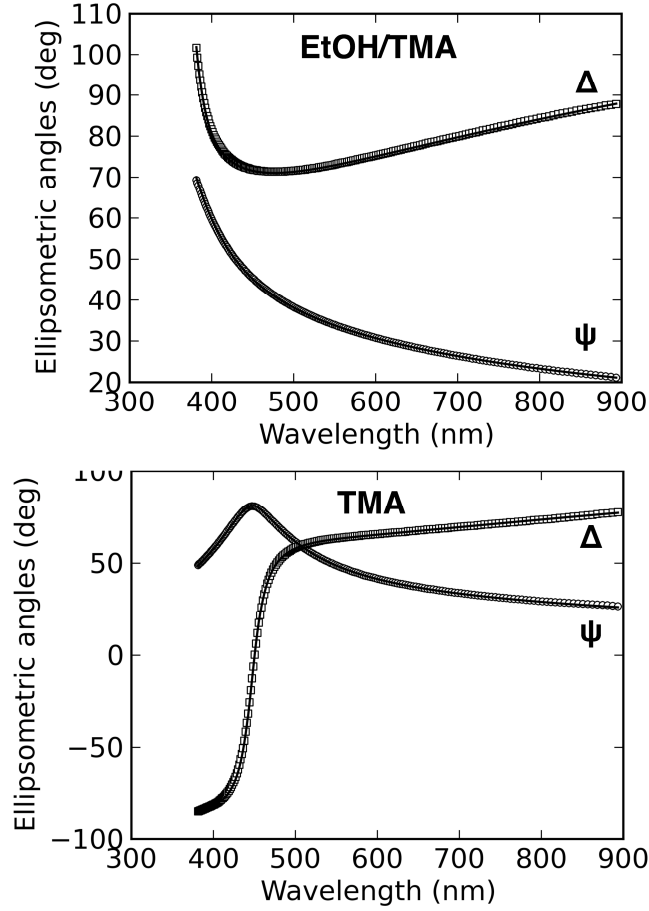

**Figure S5: Spectroscopic ellipsometry data of ALD films grown both using conventional (bottom) and surface-functionalized (top) ALD. Solid lines show the results of fitting the data using identical fitting parameters for the refractive index of both films**

The raw SE data ( $\Psi$  and  $\Delta$ ) for the films prepared using surface functionalized ALD and conventional ALD are shown as the open circles in the top and bottom panes of Fig. S5, respectively. These data were fit using a Cauchy model for the  $\text{Al}_2\text{O}_3$  refractive index:

$$n(\lambda) = A + \frac{B}{\lambda^2} + \frac{C}{\lambda^4}$$

and the best fits were obtained for both samples using the same fitting parameters:  $A=1.649$ ,  $B=0.0012 \mu\text{m}^2$  and  $C=0.00074 \mu\text{m}^4$ . The solid lines in Fig. S4 show the results for these fits where only the film thicknesses are different, and this difference accounts for the different shapes of the curves for the two samples. The identical refractive index for the two films demonstrates that surface functionalization does not contaminate the  $\text{Al}_2\text{O}_3$  films.
